# Supplementary material
Source: MDPI journal article supplement (https://www.mdpi.com/1424-2818/14/11/945)
Supplement: s1 [file s1]

**Table S1.** (Abundance 2018-2019), phenological status (acc: accidental, b: breeding, m: migration, r: resident, w: wintering, s: summering) and IUCN conservation status (E: Endangered, LC: Least Concern, NT: Near threatened, VU: Vulnerable) of recorded species in Fez pre-urban zone.

| Family       | Species                         | Phenology | Conservation | Abundance<br>(observed/heard) |
|--------------|---------------------------------|-----------|--------------|-------------------------------|
| Passeridae   | <i>Passer domesticus</i>        | r/b       | LC           | 30000                         |
|              | <i>Passer hispaniolensis</i>    | r/b       | LC           | 1000-1500                     |
| Columbidae   | <i>Streptopelia turtur</i>      | m/b       | VU           | 8000-10000                    |
|              | <i>Streptopelia decaocto</i>    | r/b       | LC           | 2000-3000                     |
|              | <i>Spilopelia senegalensis</i>  | r/b       | LC           | 5000                          |
|              | <i>Columba livia</i>            | r/b       | LC           | 4000-10000                    |
| Corvidae     | <i>Pica mauritanica</i>         | r/b       | LC           | 200-300                       |
|              | <i>Corvus monedula</i>          | r/b       | LC           | 9000-12000                    |
| Sturnidae    | <i>Sturnus unicolor</i>         | r/b       | LC           | 30000-50000                   |
|              | <i>Sturnus vulgaris</i>         | m/w       | LC           | 100-200                       |
| Oriolidae    | <i>Oriolus oriolus</i>          | m/w       | LC           | 20                            |
| Turdidae     | <i>Turdus viscivorus</i>        | m/w       | LC           | 100-200                       |
|              | <i>Turdus merula</i>            | m/w       | LC           | 100-200                       |
| Muscicapidea | <i>Muscicapa striata</i>        | m/b       | LC           | 600-1000                      |
|              | <i>Ficedula hypoleuca</i>       | m/b       | LC           | 600-1000                      |
|              | <i>Erithacus rubecula</i>       | m/w       | LC           | 300-500                       |
|              | <i>Oenanthe leucura</i>         | r/b       | LC           | 300-600                       |
|              | <i>Oenanthe deserti</i>         | r/b       | LC           | 3000-5000                     |
|              | <i>Luscinia megarhynchos</i>    | m/b       | LC           | 80-100                        |
|              | <i>Saxicola torquatus</i>       | r/b       | LC           | 500-700                       |
|              | <i>Phoenicurus ochruros</i>     | r/b       | LC           | 200-500                       |
|              | <i>Phoenicurus moussieri</i>    | r/b       | LC           | 300-500                       |
| Fringillidae | <i>Linaria canabina</i>         | r/b       | VU           | 200-300                       |
|              | <i>Carduelis carduelis</i>      | r/b       | VU           | 1000-1500                     |
|              | <i>Chloris chloris</i>          | r/b       | LC           | 7000-9000                     |
|              | <i>Coccothraustes</i>           | r/b       | LC           | 100-200                       |
|              | <i>coccothraustes</i>           |           |              |                               |
|              | <i>Serinus serinus</i>          | r/b       | LC           | 7000-9000                     |
|              | <i>Spinus spinus</i>            | m/w       | LC           | 18-30                         |
|              | <i>Fringilla montifringilla</i> | r/b       | LC           | 1000-2000                     |

|                |                                |                       |    |             |
|----------------|--------------------------------|-----------------------|----|-------------|
|                | <i>Fringilla coelebs</i>       | r/b                   | LC | 9000-15000  |
|                | <i>Spinus spinus</i>           | r/b                   | LC | 100-300     |
| Hirundinidae   | <i>Delichon urbicum</i>        | m/b                   | LC | 10000-20000 |
|                | <i>Hirundo rustica</i>         | m/b                   | LC | 30000-50000 |
| Apodidae       | <i>Apus apus</i>               | m/b                   | LC | 50000-70000 |
|                | <i>Apus pallidus</i>           | m/b                   | LC | 9000-10000  |
|                | <i>Apus melba</i>              | m/b                   | LC | 9000-10000  |
| Upupidae       | <i>Upupa epops</i>             | r/b                   | LC | 200-500     |
| Sylviidae      | <i>Sylvia atricapilla</i>      | r/b                   | LC | 500-1000    |
|                | <i>Sylvia melanocephala</i>    | r/b                   | LC | 500-1000    |
|                | <i>Sylvia borin</i>            | r/b                   | LC | 300-500     |
| Acrocephalidea | <i>Acrocephalus</i>            | r/b                   | LC | 300-500     |
|                | <i>schoenobaenus</i>           |                       |    |             |
|                | <i>Hippolais polyglotta</i>    | r/b                   | LC | 200-500     |
| Cisticolidea   | <i>Cisticola juncidis</i>      | r/b                   | LC | 100-200     |
| Cettiidea      | <i>Cettia cetti</i>            | r/b                   | LC | 800-1000    |
| Phylloscopidea | <i>Phylloscopus bonelli</i>    | r/b                   | LC | 400-600     |
|                | <i>Phylloscopus sibilatrix</i> | r/b                   | LC | 300-500     |
|                | <i>Phylloscopus collybita</i>  | r/b                   | LC | 300-500     |
|                | <i>Phylloscopus trochilus</i>  | r/b                   | LC | 200-400     |
| Troglodytidae  | <i>Troglodytes troglodytes</i> | r/b                   | LC | 300-500     |
| Paridae        | <i>Cyanist</i>                 | <i>teneriffae</i> r/b | LC | 1000-1500   |
|                | <i>ultramarinus</i>            |                       |    |             |
|                | <i>Parus major</i>             | r/b                   | LC | 1000-1500   |
| Phasianinae    | <i>Alectoris Barbara</i>       | r/b                   | LC | 400-500     |
|                | <i>Coturnix coturnix</i>       | m/b                   | LC | 100-200     |
| Alaudidae      | <i>Galerida cristata</i>       | r/b                   | LC | 8000-10000  |
| Meropidae      | <i>Merops apiaster</i>         | m/b                   | LC | 5000-7000   |
| Coraciidae     | <i>Coracias garrulous</i>      | m/b                   | LC | 200-400     |
| Caprimulgidea  | <i>Caprimulgus europaeus</i>   | m/b                   | LC | 3           |
| Motacillidae   | <i>Motacilla alba</i>          | r/b                   | LC | 1000-2000   |
|                | <i>Motacilla cinerea</i>       | r/b                   | LC | 800-1000    |
|                | <i>Motacilla flava</i>         | r/b                   | LC | 500-600     |
|                | <i>Anthus rubescens</i>        | r/b                   | LC | 100-200     |

|                   |                               |       |    |             |
|-------------------|-------------------------------|-------|----|-------------|
| Emberizidae       | <i>Emberiza calandra</i>      | r/b   | LC | 5000-8000   |
|                   | <i>Emberiza cia</i>           | r/b   | LC | 100-200     |
|                   | <i>Emberiza cirrus</i>        | r/b   | LC | 100-200     |
|                   | <i>Emberiza striolata</i>     | r/b   | LC | 500-700     |
| Cuculidae         | <i>Cuculus canorus</i>        | w     | LC | 50-80       |
|                   | <i>Clamator glandarius</i>    | r/b   | LC | 20-30       |
| Laniidae          | <i>Lanius excubitor</i>       | r/b   | LC | 800-1000    |
|                   | <i>Lanius senator</i>         | r/b   | LC | 400-600     |
| Pycnonotidae      | <i>Pycnonotus barbatus</i>    | r/b   | LC | 10000-15000 |
| Anatidae          | <i>Anas platyrhynchos</i>     | r/b   | LC | 2500-4000   |
|                   | <i>Anas acuta</i>             | m/w   | LC | 50-80       |
|                   | <i>Anas strepera</i>          | m/b   | LC | 200-400     |
|                   | <i>Anas crecca</i>            | m/w   | LC | 45-68       |
|                   | <i>Anas clypeata</i>          | m/b   | LC | 1000-2000   |
|                   | <i>Marmaronetta</i>           | m/w   | LC | 20-40       |
|                   | <i>angustirostris</i>         |       |    |             |
|                   | <i>Anas querquedula</i>       | m/w   | LC | 20-40       |
|                   | <i>Tadorna ferruginea</i>     | m/w   | LC | 4           |
|                   | <i>Aythya farina</i>          | r/b   | LC | 1000-1200   |
|                   | <i>Netta rufina</i>           | m/w   | LC | 20-30       |
|                   | <i>Aythya nyroca</i>          | r/b   | NT | 1000-1200   |
|                   | <i>Oxyura leucocephala</i>    | r/b   | EN | 80-100      |
| Phalacrocoracidae | <i>Phalacrocorax carbo</i>    | m/w   | LC | 200-300     |
| Podicipedidae     | <i>Podiceps cristatus</i>     | r/b   | LC | 100-150     |
|                   | <i>Tachybaptus ruficollis</i> | r/b   | LC | 400-600     |
|                   | <i>Podiceps nigricollis</i>   | r/b   | LC | 200-300     |
| Ardeidae          | <i>Egretta garzetta</i>       | r/b   | LC | 1500-2000   |
|                   | <i>Ixobrychus minutus</i>     | m/w   | LC | 2           |
|                   | <i>Nycticorax nycticorax</i>  | r/b   | LC | 800-1200    |
|                   | <i>Ardeola ralloides</i>      | r/b   | LC | 200-250     |
|                   | <i>Ardea alba</i>             | acc   | LC | 1           |
|                   | <i>Bubulcus ibis</i>          | r/b   | LC | 5000-10000  |
|                   | <i>Ardea cinerea</i>          | r/b   | LC | 1000-1500   |
|                   | <i>Ardea purpurea</i>         | acc/m | LC | 1           |

|                   |                                |       |    |             |
|-------------------|--------------------------------|-------|----|-------------|
| Ciconiidae        | <i>Ciconia Ciconia</i>         | r/b   | LC | 5000-10000  |
|                   | <i>Ciconia nigra</i>           | acc,m | LC | 2           |
| Threskiornithidea | <i>Plegadis falcinellus</i>    | s/m   | LC | 80          |
| Rallidae          | <i>Gallinula chloropus</i>     | r/b   | LC | 1000-1500   |
|                   | <i>Fulica atra</i>             | r/b   | LC | 20000-25000 |
|                   | <i>Fulica cristata</i>         | r/b   | LC | 18000-20000 |
|                   | <i>Porphyrio porphyrio</i>     | r/b   | LC | 200-250     |
| Charadriidae      | <i>Charadrius dubius</i>       | r/b   | LC | 200-250     |
|                   | <i>Charadrius hiaticula</i>    | m/w   | LC | 150-200     |
|                   | <i>Charadrius alexandrines</i> | m/w   | LC | 150-200     |
| Scolopacidae      | <i>Actitis hypoleucos</i>      | m/w   | LC | 300-500     |
|                   | <i>Gallinago gallinago</i>     | m/w   | LC | 300-500     |
|                   | <i>Calidris alpine</i>         | m/w   | LC | 100-150     |
|                   | <i>Limosa lapponica</i>        | m/w   | NT | 50-70       |
|                   | <i>Tringa tetanus</i>          | m/w   | LC | 30-50       |
|                   | <i>Tringa glareola</i>         | m/w   | LC | 20-30       |
|                   | <i>Tringa nebularia</i>        | m/w   | LC | 20-30       |
|                   | <i>Scolopax rusticola</i>      | r/b   | LC | 100-120     |
|                   | <i>Calidris minuta</i>         | m/w   | LC | 60-100      |
|                   | <i>Lymnocyrtus minimus</i>     | m/w   | LC | 20-40       |
|                   | <i>Tringa ochropus</i>         | r/b   | LC | 80-100      |
| Recurvirostridea  | <i>Recurvirostra avocetta</i>  | m/w   | LC | 300-500     |
|                   | <i>Himantopus Himantopus</i>   | r/b   | LC | 800-1000    |
| Glareolidea       | <i>Glareola pratincole</i>     | r/b   | LC | 100-150     |
| Burhinidea        | <i>Burhinus oedicephalus</i>   | r/b   | LC | 80-100      |
| Laridae           | <i>Chroicocephalus</i>         | r/b   | LC | 10000-20000 |
|                   | <i>ridibundus</i>              |       |    |             |
| Alcedinidae       | <i>Alcedo atthis</i>           | r/b   | LC | 80-100      |
| Falconidae        | <i>Falco tinnunculus</i>       | r/b   | LC | 500-800     |
|                   | <i>Falco naumanni</i>          | r/b   | LC | 100-200     |
| Accipitridae      | <i>Buteo rufinus</i>           | r/b   | LC | 20-50       |
|                   | <i>Circus aeruginosus</i>      | r/b   | LC | 500-800     |
|                   | <i>Accipiter nisus</i>         | r/b   | LC | 10-50       |
|                   | <i>Milvus migrans</i>          | r/b   | LC | 2000-2500   |

|             |                          |     |    |         |
|-------------|--------------------------|-----|----|---------|
|             | <i>Elanus caeruleus</i>  | r/b | LC | 40-50   |
| Pandionidea | <i>Pandion haliaetus</i> | r/b | LC | 150     |
| Strigidae   | <i>Asio otus</i>         | r/b | LC | 10      |
|             | <i>Athene noctua</i>     | r/b | LC | 500-600 |
